# Supplementary material for: DFT calculations of the structure and stability of copper clusters on MoS2
Source: publisher site journal article supplement (doi:10.3762/bjnano.11.30), 2020-02-26
Supplement: Additional file 1 [file 2190-4286-11-30-S1.pdf]

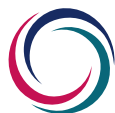

## Supporting Information

for

### DFT calculations of the structure and stability of copper clusters on MoS<sub>2</sub>

Cara-Lena Nies and Michael Nolan

*Beilstein J. Nanotechnol.* **2020**, *11*, 391–406. doi:10.3762/bjnano.11.30

## Additional computational data

## DOS Plots

Density of state plots for all  $\text{Cu}_n$  adsorption configurations are given below.

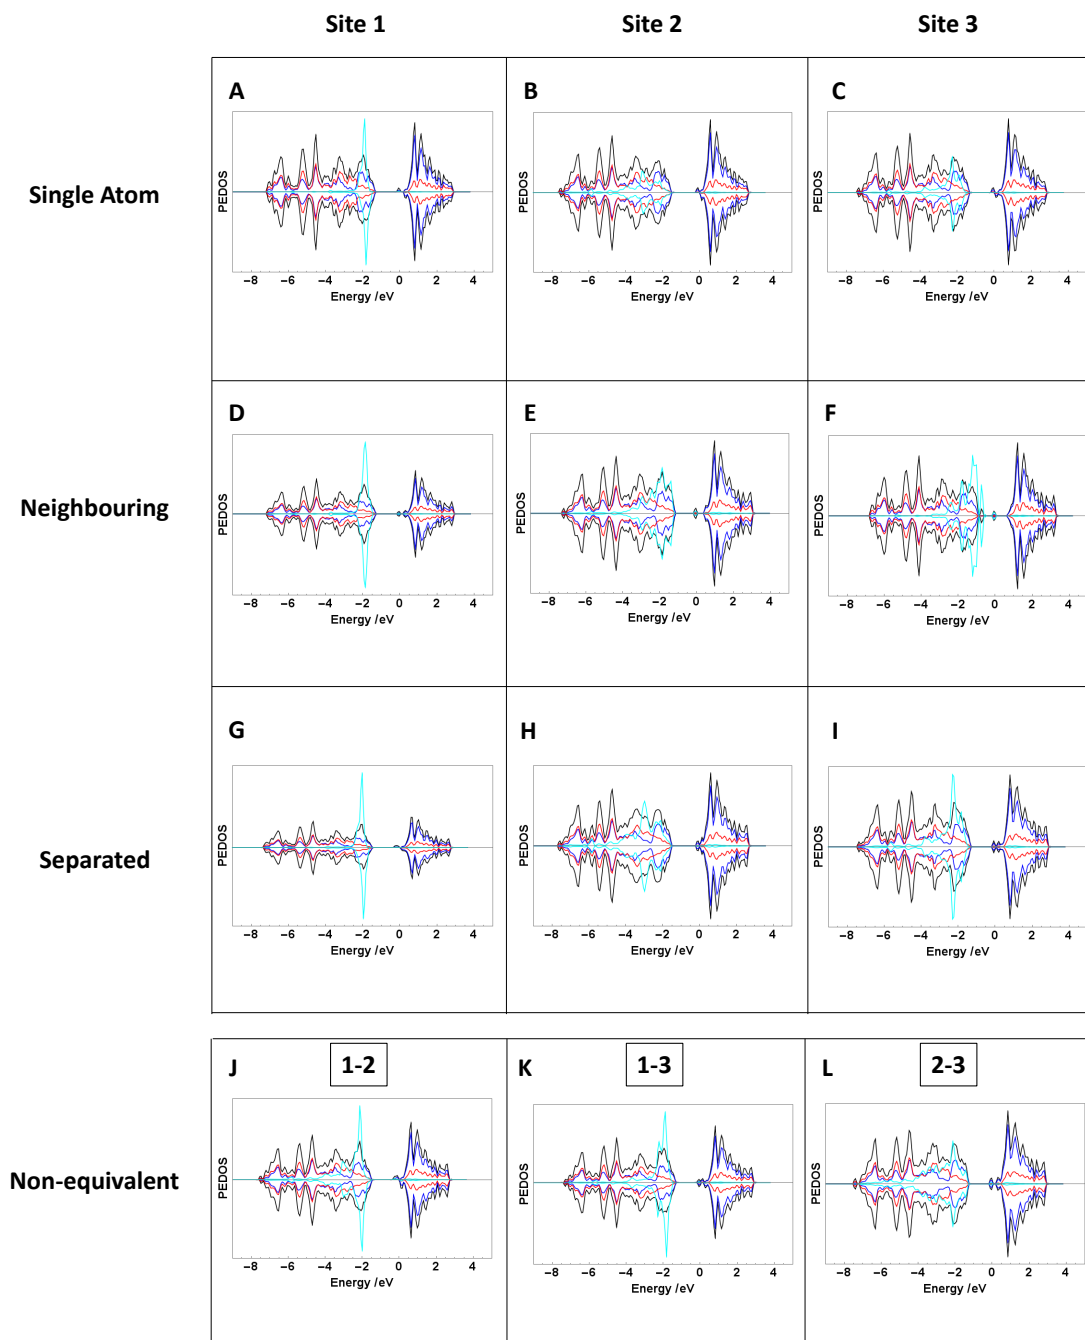

**Figure S1:** DOS plots of Cu<sub>1</sub> and Cu<sub>2</sub> adsorption structures. Black = total DOS, blue = DOS projected onto Mo d orbitals, red = DOS projected onto S p orbitals, cyan = DOS projected onto Cu d orbitals. The contribution of the Cu d orbitals has been increased by a factor of 5 for the ease of comparison.

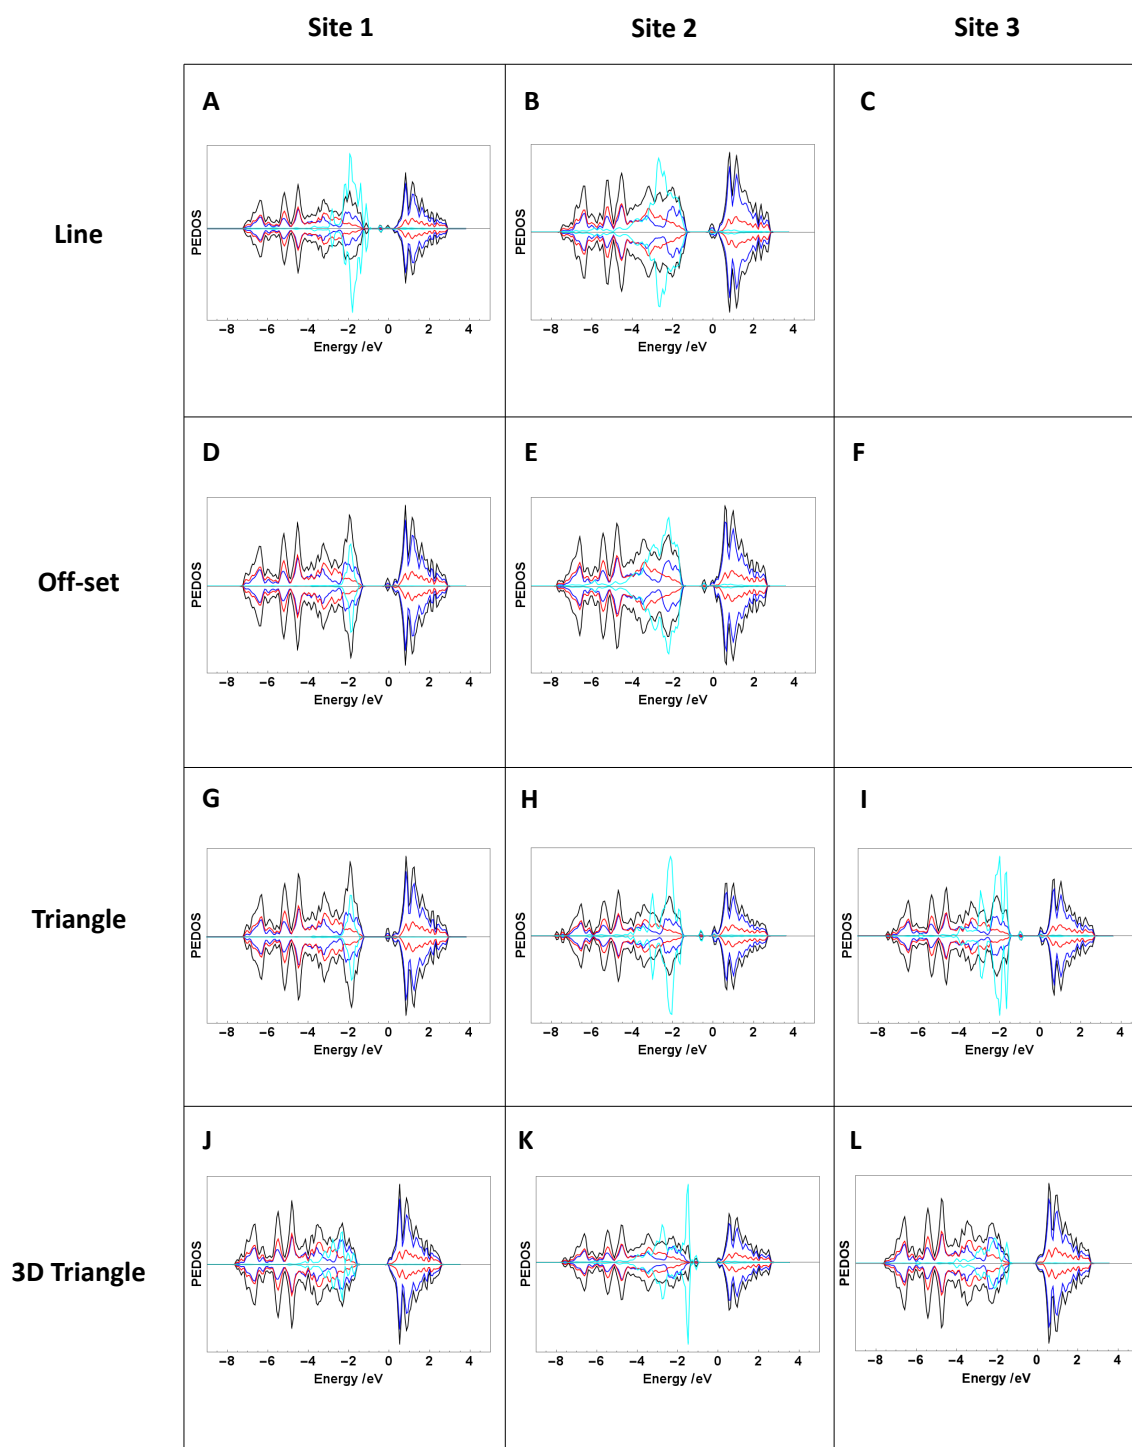

**Figure S2:** DOS plots of  $\text{Cu}_3$  adsorption structures. Black = total DOS, blue = DOS projected onto Mo d orbitals, red = DOS projected onto S p orbitals, cyan = DOS projected onto Cu d orbitals. The contribution of the Cu d orbitals has been increased by a factor of five for the ease of comparison.

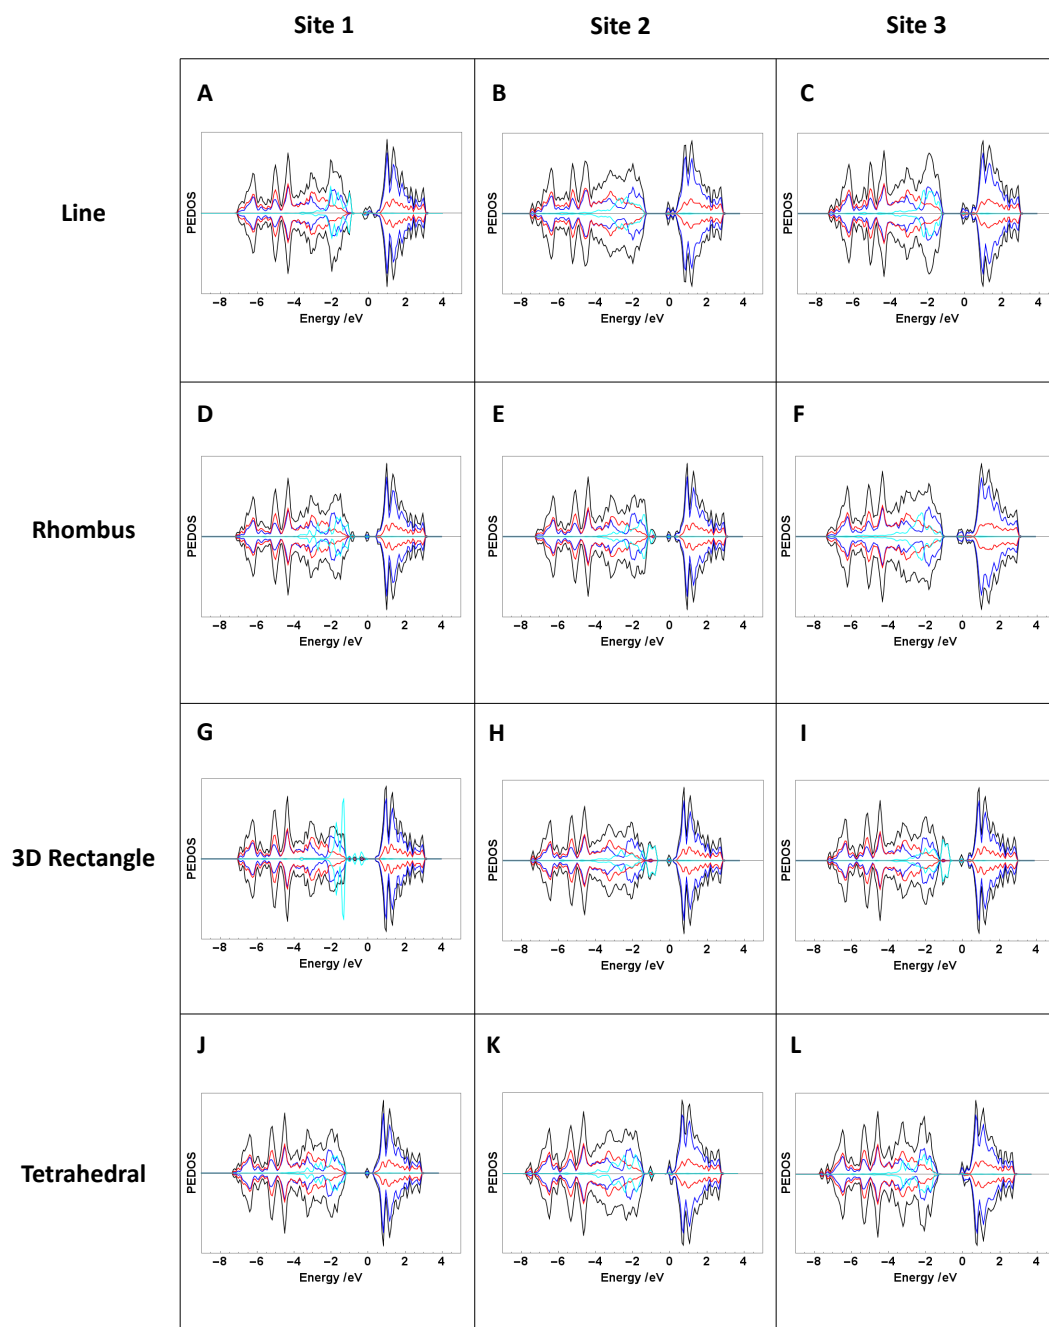

**Figure S3:** DOS plots of Cu<sub>4</sub> adsorption structures. Black = total DOS, blue = DOS projected onto Mo d orbitals, red = DOS projected onto S p orbitals, cyan = DOS projected onto Cu d orbitals. The contribution of the Cu d orbitals has been increased by a factor of five for the ease of comparison.

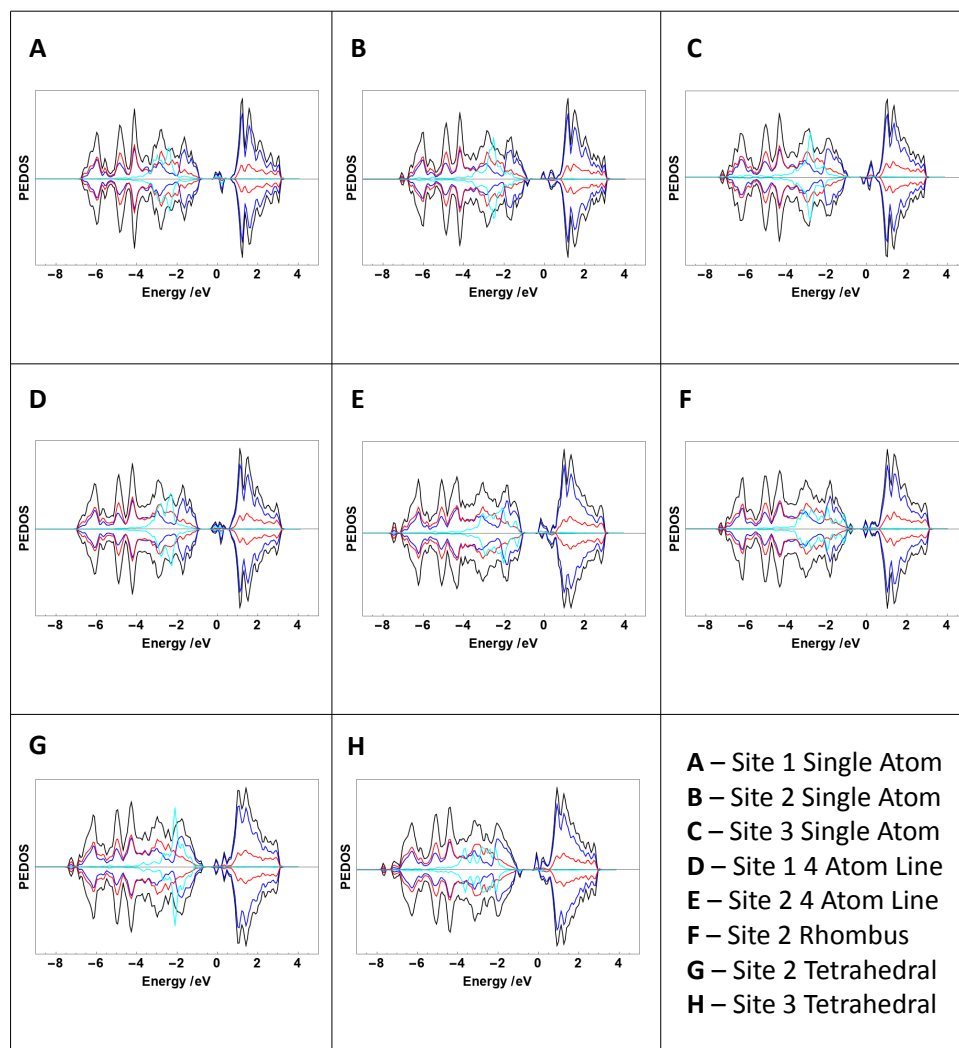

**Figure S4:** DOS plots of  $\text{Cu}_1$  and  $\text{Cu}_4$  adsorption structures on defective  $\text{MoS}_2$ . Black = total DOS, blue = DOS projected onto Mo d orbitals, red = DOS projected onto S p orbitals, cyan = DOS projected onto Cu d orbitals. The contribution of the Cu d orbitals has been increased by a factor of five for the ease of comparison.

## Charge Density Distribution after adsorption of $\text{Cu}_n$

The charge density difference after adsorption of the most favourable  $\text{Cu}_n$  is shown below.

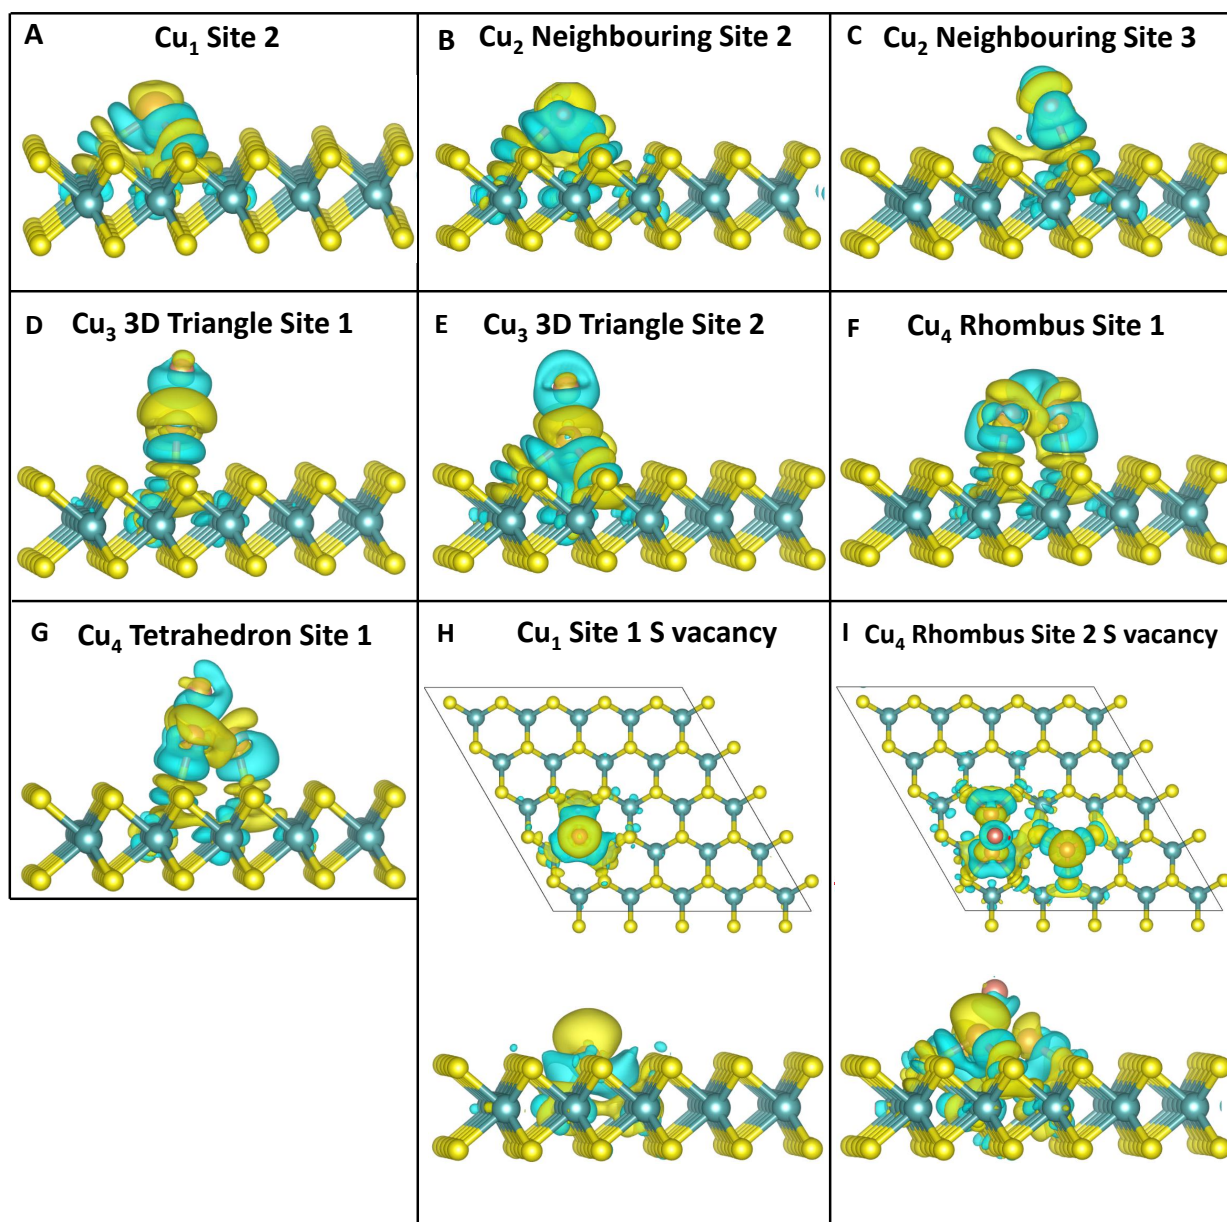

**Figure S5:** Charge density difference after adsorption of the most favourable  $\text{Cu}_n$  on pristine (A–G) and defective (H, I)  $\text{MoS}_2$ .

## Cu atom repelled from ML

An example of a Cu atom that is repelled from the MoS<sub>2</sub> ML is shown in Figure S6. This occurred during the relaxation of several Cu<sub>4</sub> structures on the MoS<sub>2</sub> monolayer with an S vacancy.

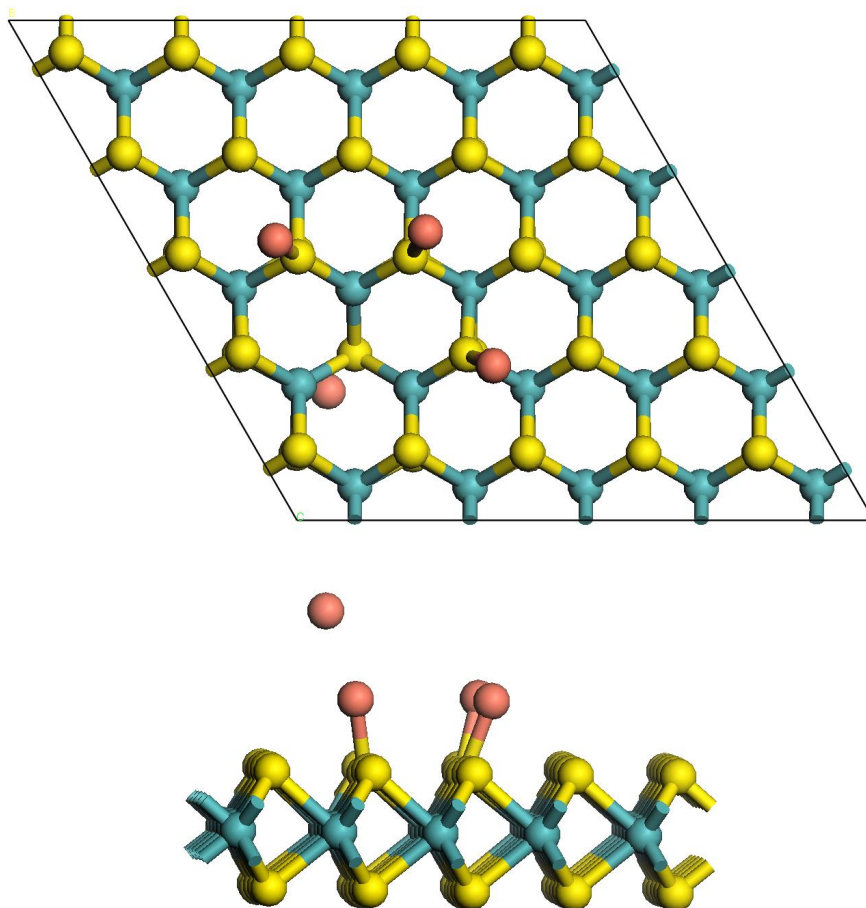

**Figure S6:** A Cu atom is repelled from the surface during the geometry relaxation.
